# Supplementary material
Source: Springer Nature journal article supplement (https://www.springermedizin.de/resource/supplementary/12960_2006_93_MOESM1_ESM.pdf/9570404)
Supplement: MOESM1 [file 9570404]

### I: Hand washing and drying

|                                                                                                                                           | Satisfactory    | Needs improvement | Not observed    | Observations                          |
|-------------------------------------------------------------------------------------------------------------------------------------------|-----------------|-------------------|-----------------|---------------------------------------|
| 1. Washes hands with soap and water and soap or with antibacterial solution before and after each patient according to the norms          | X               |                   |                 |                                       |
| 2. Washes hands with soap and water or with antibacterial solution before wearing gloves and after removing gloves according to the norms | X               |                   |                 |                                       |
| 3. Dries hands with personal towel that is clean and dry or air dries hands according to the norms                                        |                 | X                 |                 |                                       |
| <b>TOTAL<sup>1</sup></b>                                                                                                                  | <b>2</b><br>/ 3 | <b>1</b><br>/ 3   | <b>0</b><br>/ 3 | <b>Per cent satisfactory:<br/>67%</b> |

### II: Use of protective barriers

|                                                                                       | Satisfactory    | Needs improvement | Not observed    | Observations                          |
|---------------------------------------------------------------------------------------|-----------------|-------------------|-----------------|---------------------------------------|
| 1. Wears a smock that covers chest and arms adequately                                | X               |                   |                 |                                       |
| 2. Wears household gloves before handling waste or soiled equipment                   | X               |                   |                 |                                       |
| 3. Decontaminates household gloves before removal                                     | X               |                   |                 |                                       |
| 4. Wears gloves each time there is risk of exposure to blood or other organic liquids |                 | X                 |                 |                                       |
| 5. Wears a smock, mask, hairnet, glasses, and shoe covers <sup>2</sup>                |                 | X                 |                 | Provider not wearing smock or hairnet |
| <b>TOTAL</b>                                                                          | <b>3</b><br>/ 5 | <b>2</b><br>/ 5   | <b>0</b><br>/ 5 | <b>Per cent satisfactory:<br/>60%</b> |

### III: Decontamination

|                                                                      | Satisfactory | Needs improvement | Not observed | Observations |
|----------------------------------------------------------------------|--------------|-------------------|--------------|--------------|
| 1. Prepares a chlorinated solution (0.5%)                            | X            |                   |              |              |
| 2. Soaks used instruments in decontamination solution for 10 minutes | X            |                   |              |              |
| 3. Removes instruments after 10 minutes                              | X            |                   |              |              |
